# Supplementary material for: The potential savings of using thiazides as the first choice antihypertensive drug: cost-minimisation analysis
Source: Springer Nature journal article supplement (doi:10.1186/1472-6963-3-18), 2003-09-08
Supplement: Additional file 1 [file 1472-6963-3-18-s1.doc]

# Additional file 1: mathematical summary

(1) Potential users of thiazides (per 1000) for the management of hypertension

**= Hyppop x NotCVDhyp x Thiazidesunc**

Hyppop = proportion of the population being treated medically for hypertension (per 1000)

NotCVDhyp = proportion of people taking medication for the management of hypertension who do not have other cardiovascular disease

Thiazidesunc = proportion of people with uncomplicated hypertension for whom thiazides are appropriate

**(2) Current use of thiazides for the management of hypertension**

**= Usethiazides x Hypthiazides**

Usethiazides  = current total use of thiazides (DDDs/1000 inhabitants/day)

Hypthiazides = proportion of thiazides used specifically for the management of hypertension

**(3) Current use of non-thiazide antihypertensives for the management of**

**hypertension**

**= (Use x Hyp)alpha + (Use x Hyp)beta + (Use x Hyp)ccb + (Use x Hyp)ace + (Use x Hyp)aII**

Use = current total use (DDDs/1000 inhabitants/day)

Hyp = proportion used for the management of hypertension

alpha = alpha blockers

beta = beta-blocking agents

ccb = calcium channel blockers

ace = ACE-inhibitors

aII = angiotensin II inhibitors

(4)  non-thiazides (%) =  alpha (%) =  beta (%) =  ccb (%) =  ace (%) =  aII (%)

 X (%) = Potential reduction in use of X for the management of hypertension, expressed as a percentage

**(5) Current costs of non-thiazide antihypertensives for the management of**

**hypertension**

**= (Cost x Hyp)alpha + (Cost x Hyp)beta + (Cost x Hyp)ccb + (Cost x Hyp)ace + (Cost x Hyp)aII**

Cost = current total cost
